# Supplementary material for: Integrating species and interactions into similarity metrics: a graph theory-based approach to understanding community similarity
Source: PeerJ journal article supplement (doi:10.7717/peerj.7013), 2019-05-31

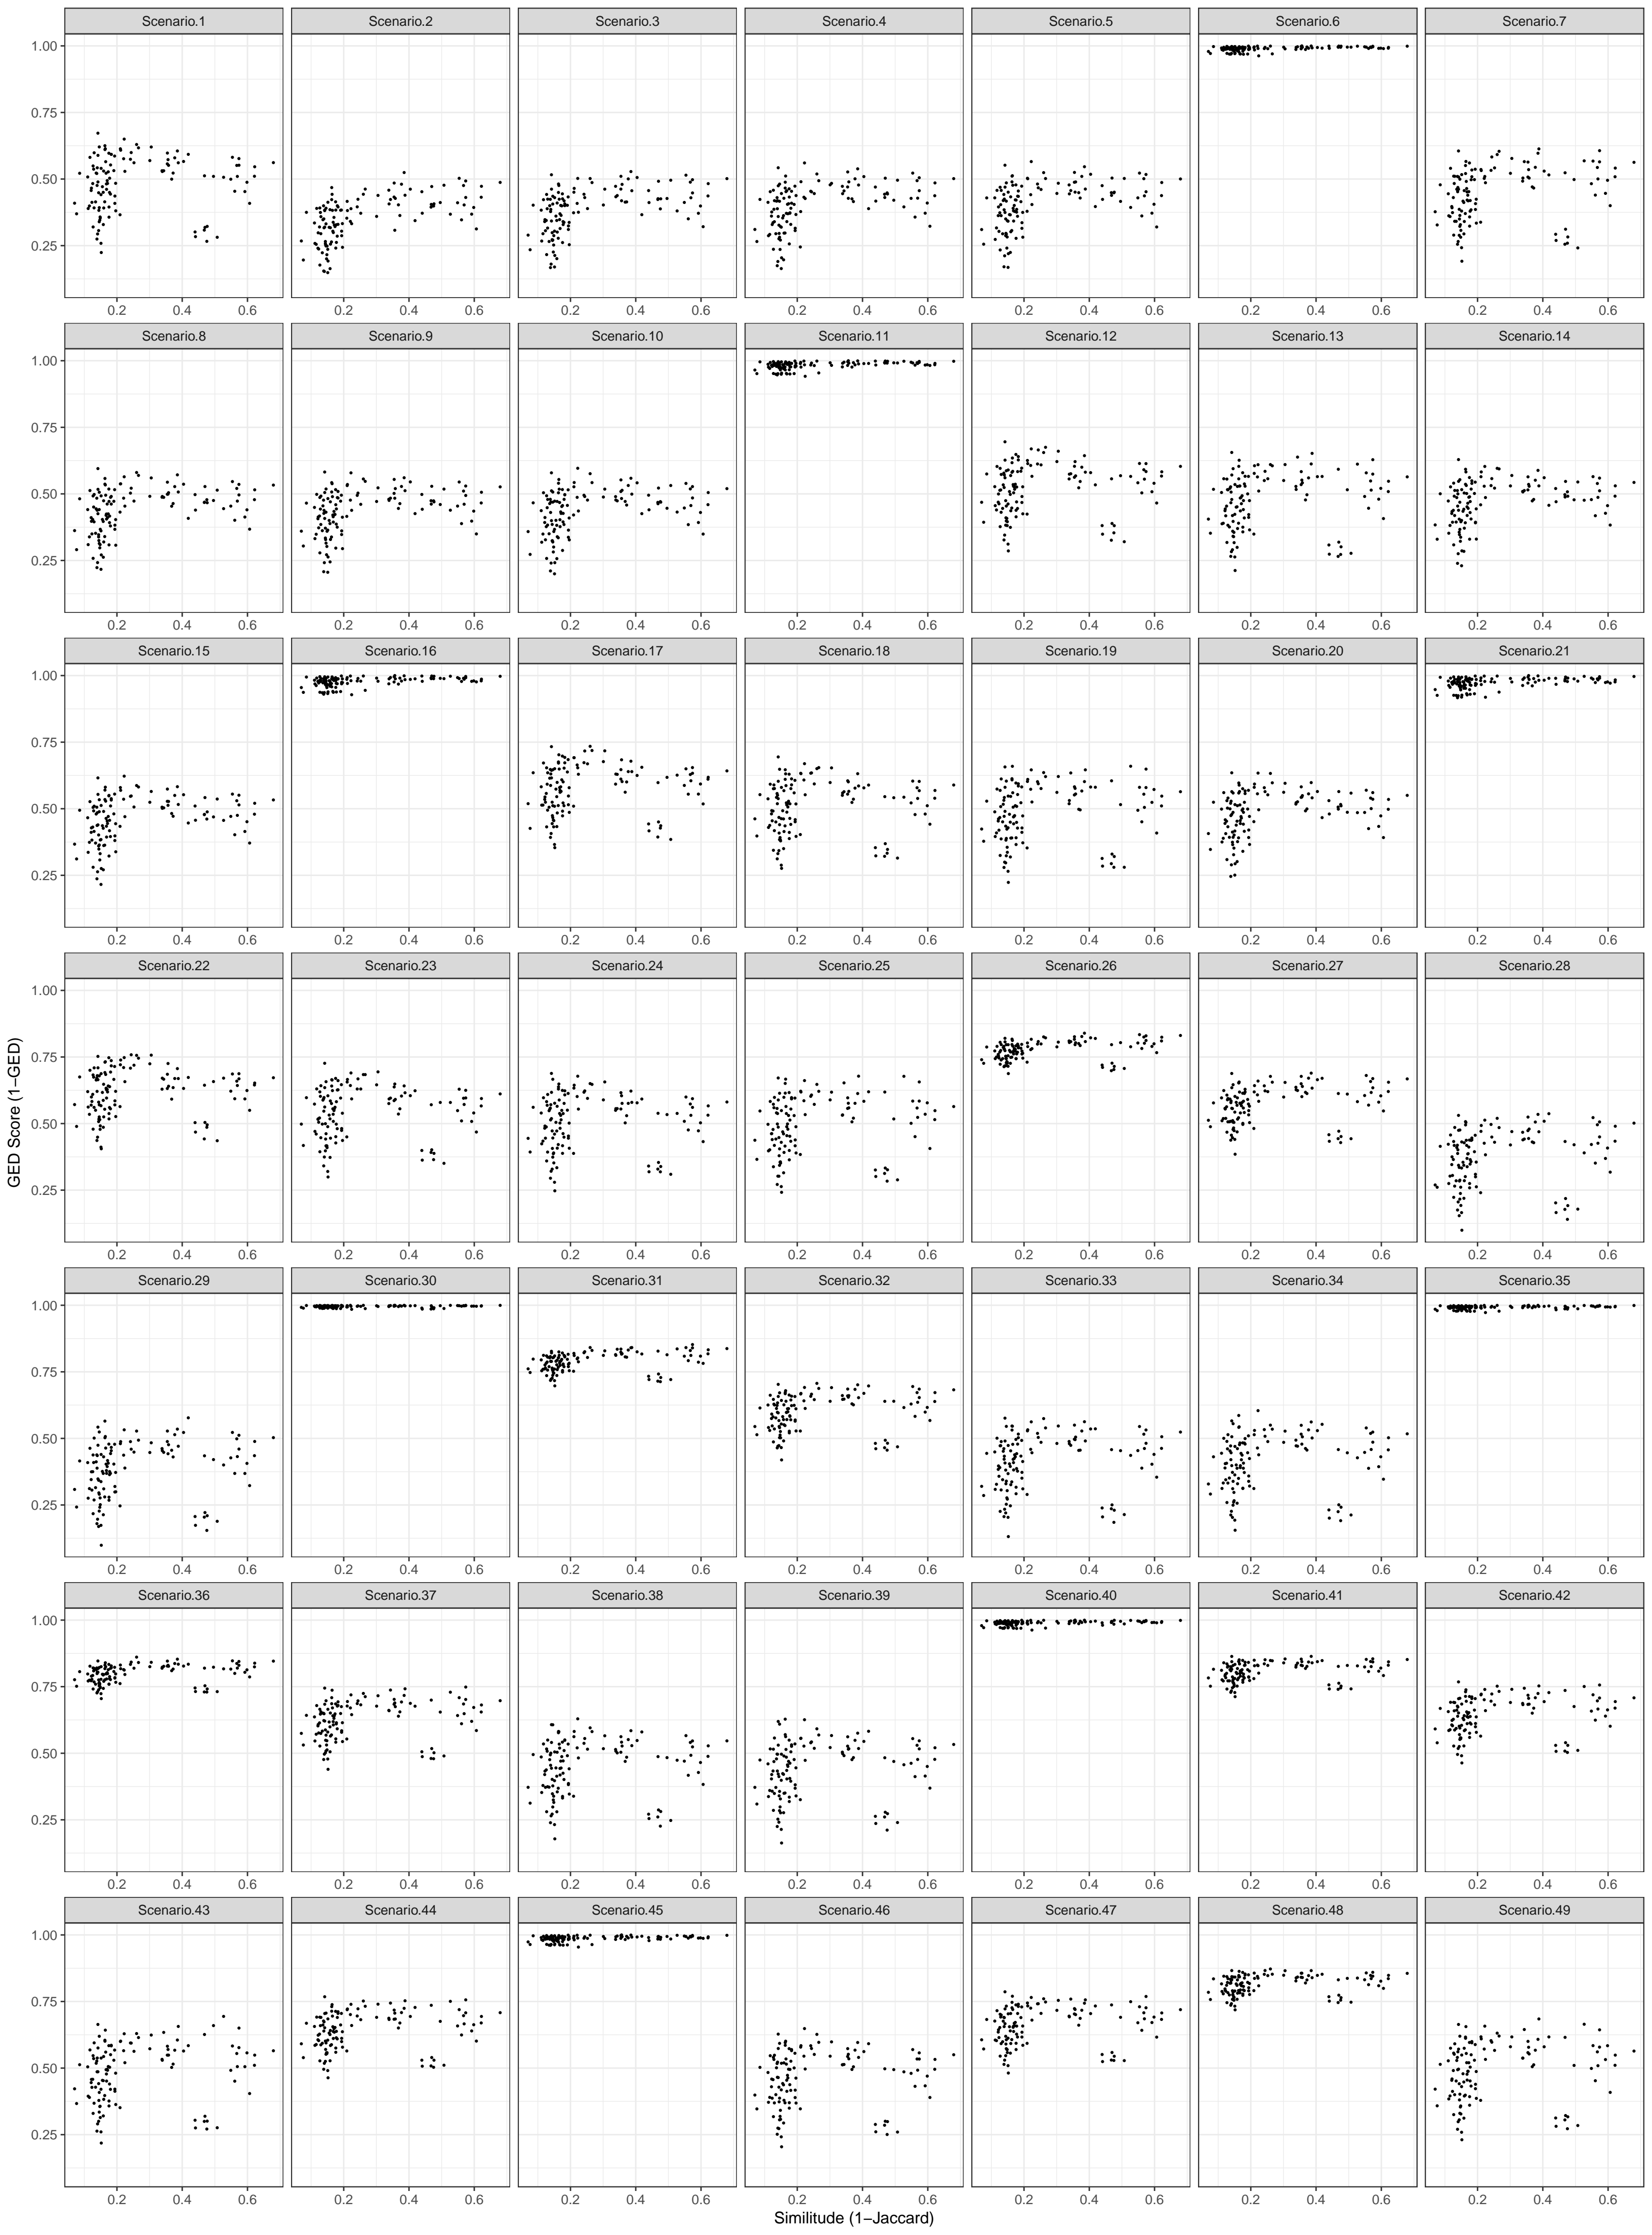

Supplement: figureS1.pdf [file figureS1.pdf]
